# Supplementary material
Source: MDPI journal article supplement (https://www.mdpi.com/search?q=molbank-2020-M1111)
Supplement: s002 [file molbank-2020-M1111-s002-mod.mol]

Scheme - Copy.mol
  corina  11302005313D 1   1.00000     0.00000 
CORINA 4.3.0 0026  30.10.2019
 38 41  0  0  0  0  0  0  0  0999 V2000
   -1.5723    9.2653   -1.6422 C   0  0  0  0  0  0  0  0  0  0  0  0
   -1.5598    7.7466   -1.4483 C   0  0  0  0  0  0  0  0  0  0  0  0
   -0.1091    7.2556   -1.4188 C   0  0  0  0  0  0  0  0  0  0  0  0
    0.5917    7.6843   -2.7117 C   0  0  0  0  0  0  0  0  0  0  0  0
    0.4961    9.2055   -2.8546 C   0  0  0  0  0  0  0  0  0  0  0  0
   -0.8780    9.5979   -2.8461 O   0  0  0  0  0  0  0  0  0  0  0  0
    1.2612    9.7155   -4.4182 S   0  3  0  0  0  0  0  0  0  0  0  0
   -2.9967    9.7488   -1.7336 C   0  0  0  0  0  0  0  0  0  0  0  0
   -3.4038   10.2384   -2.7605 O   0  0  0  0  0  0  0  0  0  0  0  0
    0.2485    9.2605   -5.4594 O   0  5  0  0  0  0  0  0  0  0  0  0
   -2.2643    7.1129   -2.5485 O   0  0  0  0  0  0  0  0  0  0  0  0
   -4.1285    7.2509   -1.3699 O   0  0  0  0  0  0  0  0  0  0  0  0
   -3.5819    6.9101   -2.3921 C   0  0  0  0  0  0  0  0  0  0  0  0
   -4.3795    6.2574   -3.4916 C   0  0  0  0  0  0  0  0  0  0  0  0
   -3.8132    9.6355   -0.6743 O   0  0  0  0  0  0  0  0  0  0  0  0
   -5.1719   10.1222   -0.8341 C   0  0  0  0  0  0  0  0  0  0  0  0
    1.0585   11.4658   -4.4064 C   0  0  0  0  0  0  0  0  0  0  0  0
    2.0333   12.2707   -3.8472 C   0  0  0  0  0  0  0  0  0  0  0  0
    1.8742   13.6438   -3.8379 C   0  0  0  0  0  0  0  0  0  0  0  0
    0.7405   14.2120   -4.3882 C   0  0  0  0  0  0  0  0  0  0  0  0
   -0.2339   13.4071   -4.9482 C   0  0  0  0  0  0  0  0  0  0  0  0
   -0.0728   12.0343   -4.9614 C   0  0  0  0  0  0  0  0  0  0  0  0
    1.9657    7.2948   -2.6617 O   0  0  0  0  0  0  0  0  0  0  0  0
    3.9789    6.6104   -3.7696 C   0  0  0  0  0  0  0  0  0  0  0  0
    4.3121    5.2821   -3.5810 C   0  0  0  0  0  0  0  0  0  0  0  0
    5.6362    4.9172   -3.4246 C   0  0  0  0  0  0  0  0  0  0  0  0
    6.6271    5.8805   -3.4569 C   0  0  0  0  0  0  0  0  0  0  0  0
    6.2939    7.2088   -3.6456 C   0  0  0  0  0  0  0  0  0  0  0  0
    4.9703    7.5731   -3.8072 C   0  0  0  0  0  0  0  0  0  0  0  0
    2.5354    7.0082   -3.9405 C   0  0  0  0  0  0  0  0  0  0  0  0
   -0.0888    5.8306   -1.3139 O   0  0  0  0  0  0  0  0  0  0  0  0
   -0.0501    3.8402    0.0223 C   0  0  0  0  0  0  0  0  0  0  0  0
   -1.2377    3.1328    0.0294 C   0  0  0  0  0  0  0  0  0  0  0  0
   -1.2190    1.7506    0.0173 C   0  0  0  0  0  0  0  0  0  0  0  0
   -0.0126    1.0758    0.0080 C   0  0  0  0  0  0  0  0  0  0  0  0
    1.1750    1.7832    0.0004 C   0  0  0  0  0  0  0  0  0  0  0  0
    1.1563    3.1654    0.0081 C   0  0  0  0  0  0  0  0  0  0  0  0
   -0.0705    5.3471    0.0307 C   0  0  0  0  0  0  0  0  0  0  0  0
  1  2  1  0      
  2  3  1  0      
  3  4  1  0      
  5  4  1  0      
  5  6  1  0      
  6  1  1  0      
  5  7  1  0      
  1  8  1  0      
  8  9  2  0      
  7 10  1  0      
 13 14  1  0      
 12 13  2  0      
 11 13  1  0      
  2 11  1  0      
 15 16  1  0      
  8 15  1  0      
 21 22  2  0      
 20 21  1  0      
 19 20  2  0      
 18 19  1  0      
 17 18  2  0      
 17 22  1  0      
  7 17  1  0      
 28 29  2  0      
 27 28  1  0      
 26 27  2  0      
 25 26  1  0      
 24 25  2  0      
 24 29  1  0      
 24 30  1  0      
 23 30  1  0      
  4 23  1  0      
 36 37  2  0      
 35 36  1  0      
 34 35  2  0      
 33 34  1  0      
 32 33  2  0      
 32 37  1  0      
 32 38  1  0      
 31 38  1  0      
  3 31  1  0      
M  CHG  2   7   1  10  -1
M  STY  1   1 SUP
M  SLB  1   1   1
M  SAL   1  4  11  12  13  14
M  SBL   1  1  14
M  SMT   1 OAc
M  SBV   1 14   -7.3689    3.3623
M  STY  1   2 SUP
M  SLB  1   2   2
M  SAL   2  2  15  16
M  SBL   2  1  16
M  SMT   2 OMe
M  SBV   2 16   -8.0834    4.5998
M  STY  1   3 SUP
M  SLB  1   3   3
M  SAL   3  6  17  18  19  20  21  22
M  SBL   3  1  23
M  SMT   3 Ph
M  SBV   3 23   -6.9565    3.4728
M  STY  1   4 SUP
M  SLB  1   4   4
M  SAL   4  8  23  24  25  26  27  28  29  30
M  SBL   4  1  32
M  SMT   4 OBn
M  SBV   4 32   -6.7727    4.3150
M  STY  1   5 SUP
M  SLB  1   5   5
M  SAL   5  8  31  32  33  34  35  36  37  38
M  SBL   5  1  41
M  SMT   5 OBn
M  SBV   5 41   -7.3689    5.0123
M  END
$$$$
